# Supplementary material for: Chromosome-encoded IpaH ubiquitin ligases indicate non-human enteroinvasive Escherichia
Source: PubMed Central journal article supplement (PMC9046306; doi:10.1038/s41598-022-10827-3), 2022-04-27
Supplement: 41598_2022_10827_MOESM1_ESM.pdf [file 41598_2022_10827_MOESM1_ESM.pdf]

## Supplementary Figures

### Chromosome-encoded IpaH ubiquitin ligases indicate non-human enteroinvasive *Escherichia*

Authors: Natalia O. Dranenko<sup>1</sup>, Maria N. Tutukina<sup>1,2,3</sup>, Mikhail S. Gelfand<sup>1,2</sup>,  
Fyodor A. Kondrashov<sup>4</sup>, Olga O. Bochkareva<sup>4#</sup>

#### Affiliations:

<sup>1</sup> A.A. Kharkevich Institute for Information Transmission Problems, Moscow, Russia

<sup>2</sup> Skolkovo Institute of Science and Technology, Moscow, Russia

<sup>3</sup> Institute of Cell Biophysics, Russian Academy of Sciences, FRC PSCBR RAS, Moscow Region, Pushchino, Russia

<sup>4</sup> Institute of Science and Technology (IST Austria), Klosterneuburg, Austria

# Correspondence: [olga.bochkareva@ist.ac.at](mailto:olga.bochkareva@ist.ac.at)



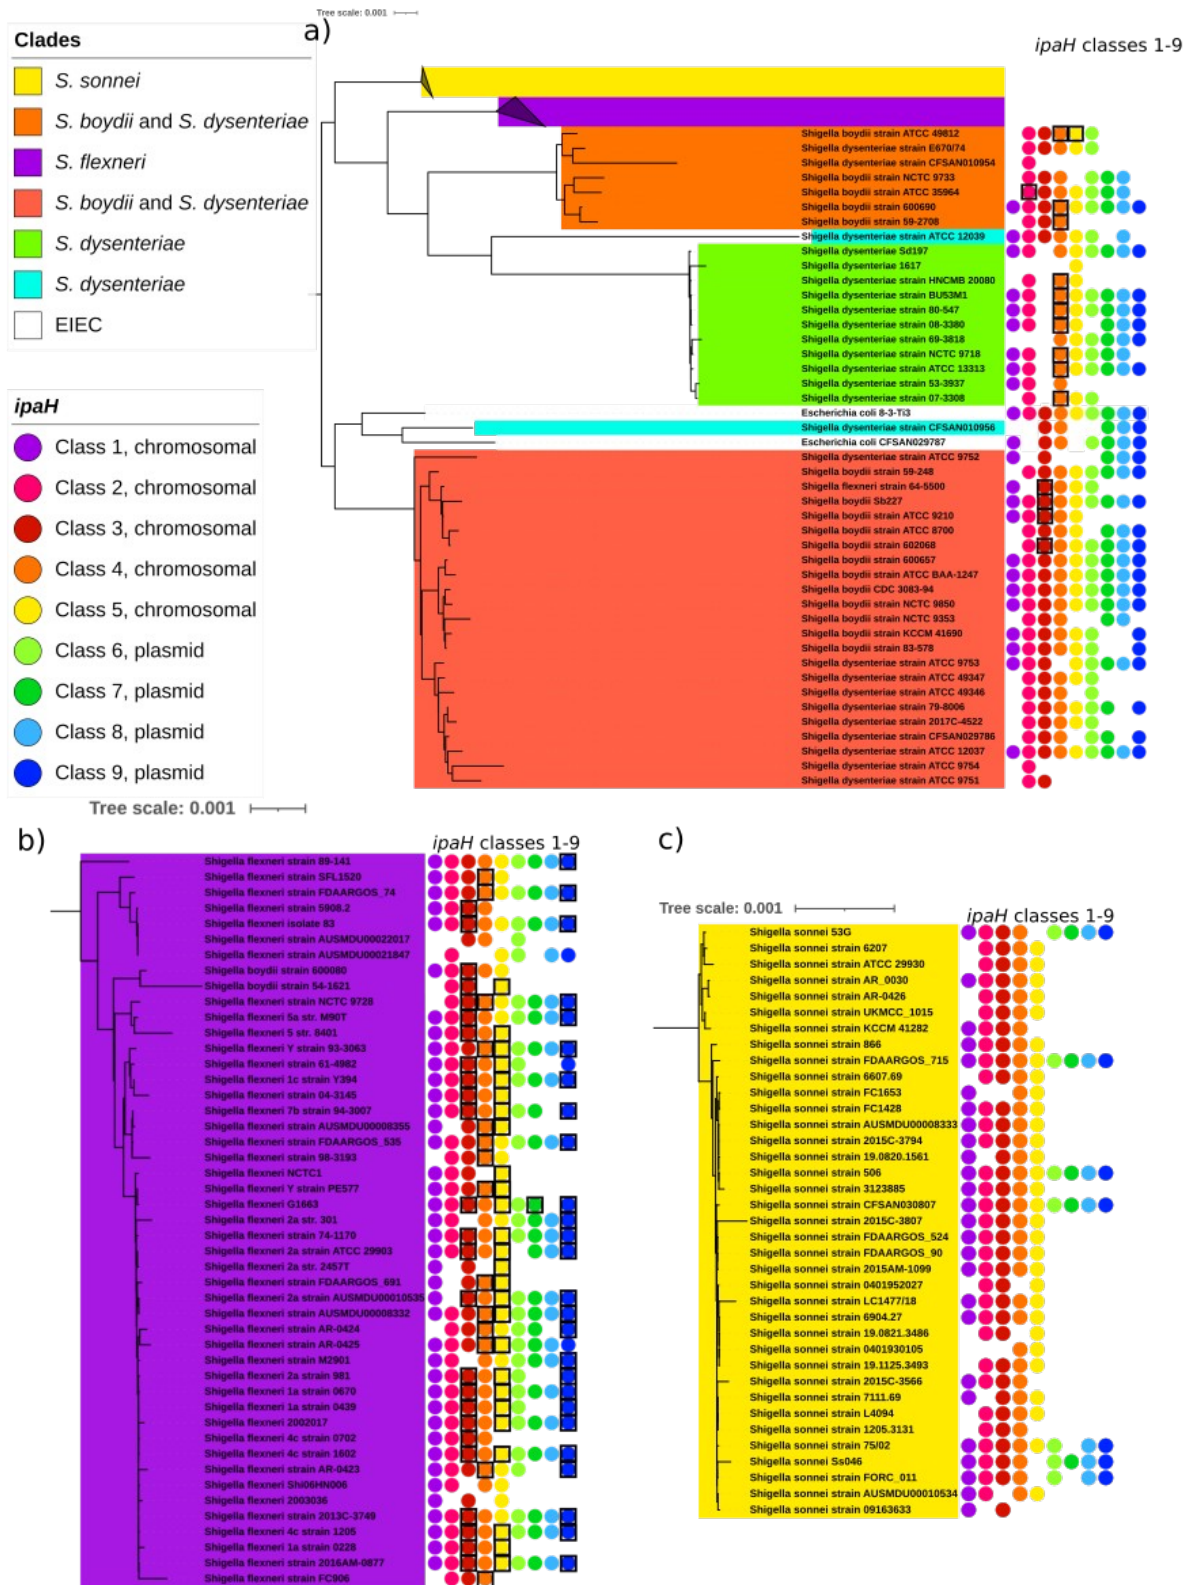

**Supplementary Figure S2. Abundance of the *ipaH* family members in *Shigella* clades.** The notation as in **Figure 3**. Black frames indicate duplications. Panels (a), (b), and (c) reflect three major tree clades.

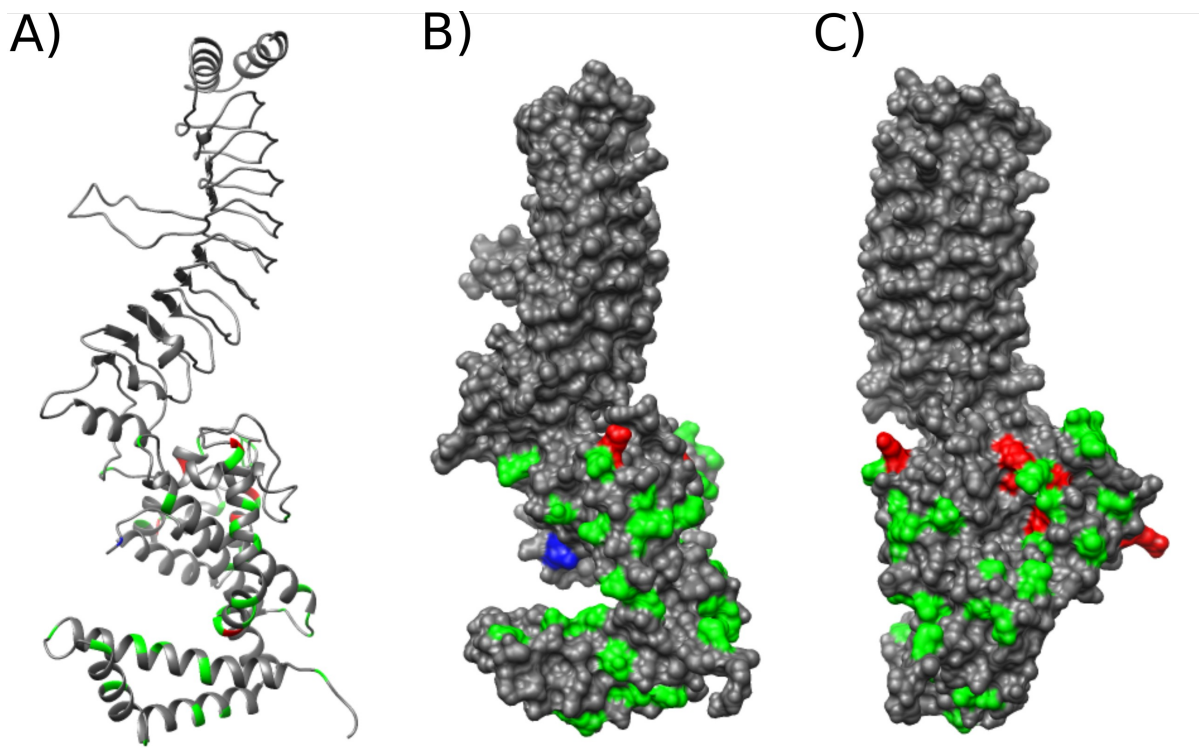

**D)**

|                   |                                                               |
|-------------------|---------------------------------------------------------------|
| ShigellaCdomain   | GPQIYFSMSDGQNTLHRPLADAVTAWFPENKQSDVSOIWHAFEEEHANTFSAFLDRLS    |
| Non-humanCdomain1 | GPQIHFSMSDGQHTSVRPLPEAVAAWFPQNKQSDVSOIWLAFEREHANTFSAFLDRLA    |
| Non-humanCdomain2 | GPQIHFSMSDGQHTPVRSLPEAVAAWFPESLRSEVSQRWAAFTDEENAATFSAFLDRLA   |
| ShigellaCdomain   | DTV SARNTSGFRQVAWLEKLS TSAELRQQSFAVAADATESCEDRVALTWNLRKTLV    |
| Non-humanCdomain1 | DTV ARNAQGFRRQVSALFLEKLS TSAELRQQSFAVAADATESCEDRVALTWNLQKSLV  |
| Non-humanCdomain2 | DTV TARNAPGFAQQVSEFLEKLSMSEALRQQCFAVAADATRSCEDRVALTWNLQKTYRV  |
| ShigellaCdomain   | HQASEGLFDNDTGALLSLGREMFRLEILEDIARDKVRTLHFVDEIEVYLAFQTMLAEKLG  |
| Non-humanCdomain1 | HQASEGLFDNDTGALLSLGREMFRLEILEDIARDKVRTLRFVDEIEVYLAFQTMLAEKLG  |
| Non-humanCdomain2 | HQASEGEFDSDLTGALLSLGREMYRLEVLEEIAREKVRTLHFVDEIEVSLAFQTMLAEKLE |
| ShigellaCdomain   | LSTAVKEMRFYGVSGVTANDLRTAEAMVRSRENEFTDWFSLWGPWHAVLKRTEADRWAQ   |
| Non-humanCdomain1 | LSTAVKEMRFYGVSGVTENDLRTAEAMVRSRENEFTDWFALWGPWHAVLKRTEADRWAQ   |
| Non-humanCdomain2 | LSTAVREMRFYGVSGVTEDDLSSALVRVLSREEREFAEWFARWSPWHAVLKRTEAERWAR  |
| ShigellaCdomain   | AEEQKYEMLENEYQPQVADRLKASGLSGDAEREAGAVMRETEQIYRQLTDEVLAIR      |
| Non-humanCdomain1 | AEEQKYEMLENEYQPQVADRLKASGLSGDAEREAGAVMRETEQIYRQLTDEVLAIR      |
| Non-humanCdomain2 | AEEKKYEMLERKYPQRLAERLSALDLSGDGAEREAGVVRMEEIETIYRQLTTEEVSGER   |
| ShigellaCdomain   | RLPENGSRLHHS                                                  |
| Non-humanCdomain1 | RLPENGSRLHHS                                                  |
| Non-humanCdomain2 | RLAENRAR----                                                  |

**Supplementary Figure S3. Homology modeling of IpahH from *Escherichia marmotae*.**

The predicted protein structure of *Escherichia marmotae* IpahH class 1 **(A)** as a ribbon representation; **(B)** with surface of the protein as seen from the binding site side; **(C)** with surface of the protein from the side opposite to the binding site. **(D)** Sequence alignment of three variants of the C-terminal domains from *Shigella* spp. and *Escherichia marmotae*. The active site is marked in blue. The

positions strongly shared between two domains from *E. marmotae* but diverse in *Shigella* are marked in red; the positions strongly shared between *Shigella* and *Shigella*-type domain from *E. marmotae* are marked in green.
